# Supplementary material
Source: PubMed Central journal article supplement (PMC5551035)
Supplement: NIHMS886780-supplement-5.pdf [file NIHMS886780-supplement-5.pdf]

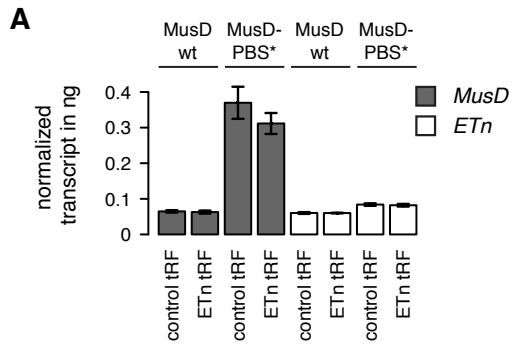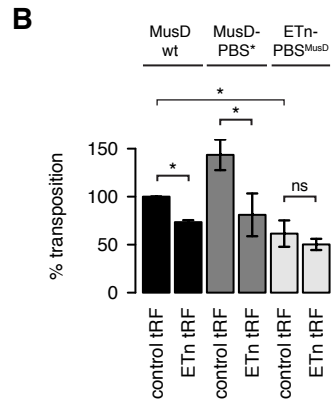

**C**

PBS

|            |                                                           |
|------------|-----------------------------------------------------------|
| ETnIbeta   | TGGCGCC <u>CGAACA</u> AGGGACCTGAAGAATGGCAGAGAGATGC        |
| MusD6      | TGGCGCCAGAACTGGGACCTGAAGAATGGCAGAGAGATGC                  |
| MusD6-PBS* | <u>TAGCGACTAAACACATCA</u> CTGAAGAAT <u>CCG</u> AGAGAGATGC |
