# Supplementary material
Source: PubMed Central journal article supplement (PMC5551035)

**A**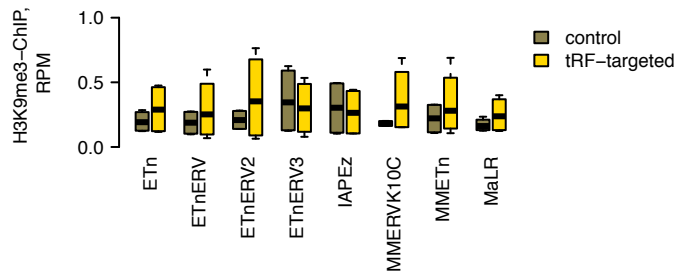**B**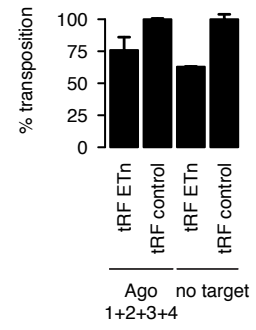

Supplement: NIHMS886780-supplement-4.pdf [file NIHMS886780-supplement-4.pdf]

**A**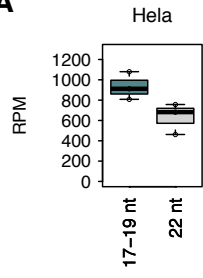**B**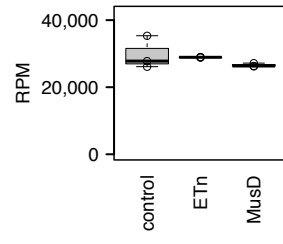**C**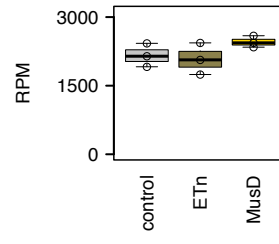

Supplement: NIHMS886780-supplement-6.pdf [file NIHMS886780-supplement-6.pdf]
